# Supplementary material
Source: PubMed Central journal article supplement (PMC3495090)
Supplement: NIHMS390755-supplement-supplement_1.pdf [file NIHMS390755-supplement-supplement_1.pdf]

### **Supplemental Figure 1**

Immunofluorescence staining of CD11b (left) and CD8 (right) demonstrates that the majority of perivascular infiltrates are composed of macrophages and CD8+ T cells in allografts. \* represents vascular lumen.

### **Video file 1**

The clip demonstrates the donor kidney along with the ureter and bladder prior to anastomosis to the recipient.

### **Video file 2**

The clip shows the cross clamp removal following anastomosis. Note the change in color in the graft that manifests full reperfusion.

Supplemental Figure 1

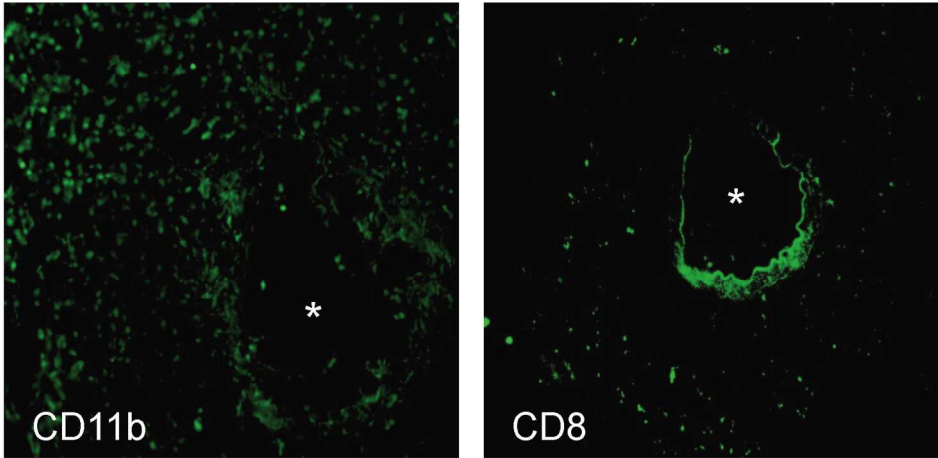

127x78mm (600 x 600 DPI)
